# Supplementary material
Source: Springer Nature journal article supplement (https://www.springermedizin.de/resource/supplementary/12947_2012_446_MOESM2_ESM.pdf/9555764)
Supplement: MOESM2 [file 9555764]

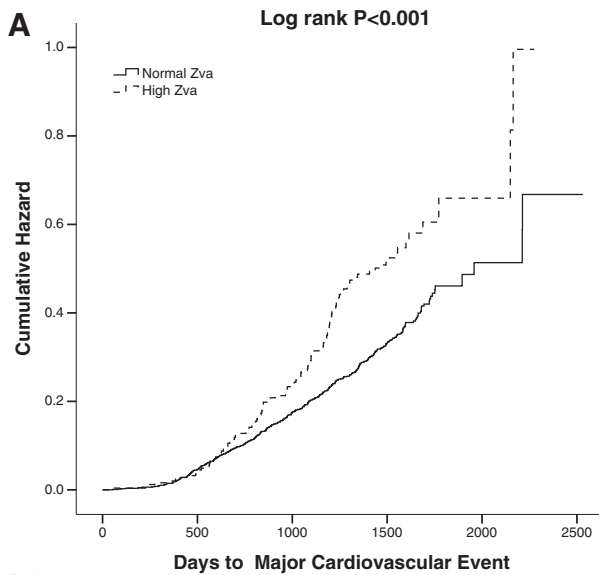

*Patients at risk*

|            |      |      |     |     |    |   |
|------------|------|------|-----|-----|----|---|
| High Zva   | 252  | 240  | 194 | 125 | 9  | 0 |
| Normal Zva | 1166 | 1111 | 965 | 683 | 36 | 1 |

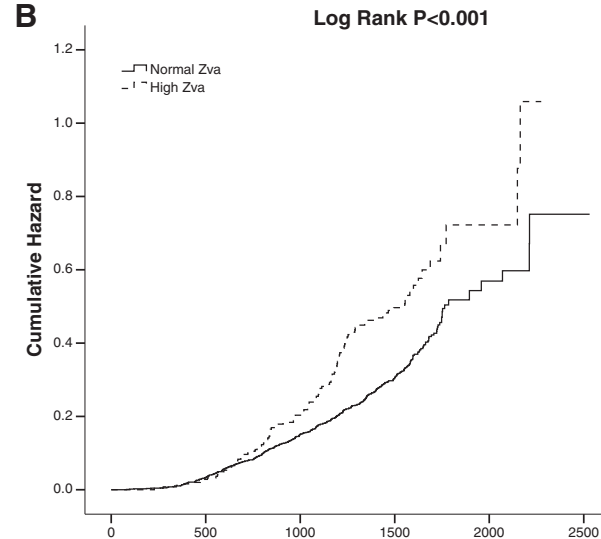

*Patients at risk*

|            |      |      |     |     |     |   |
|------------|------|------|-----|-----|-----|---|
| High Zva   | 252  | 243  | 200 | 128 | 9   | 0 |
| Normal Zva | 1166 | 1125 | 989 | 706 | 137 | 1 |

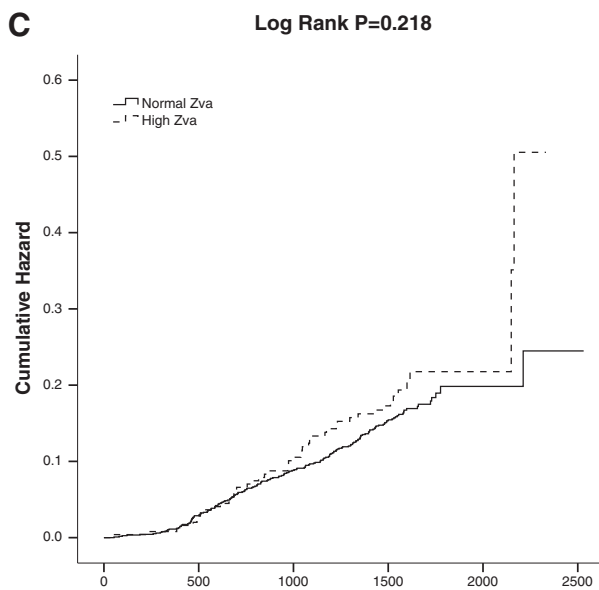

*Patients at risk*

|            |      |      |      |     |    |   |
|------------|------|------|------|-----|----|---|
| High Zva   | 252  | 243  | 221  | 173 | 11 | 0 |
| Normal Zva | 1166 | 1130 | 1053 | 826 | 49 | 1 |

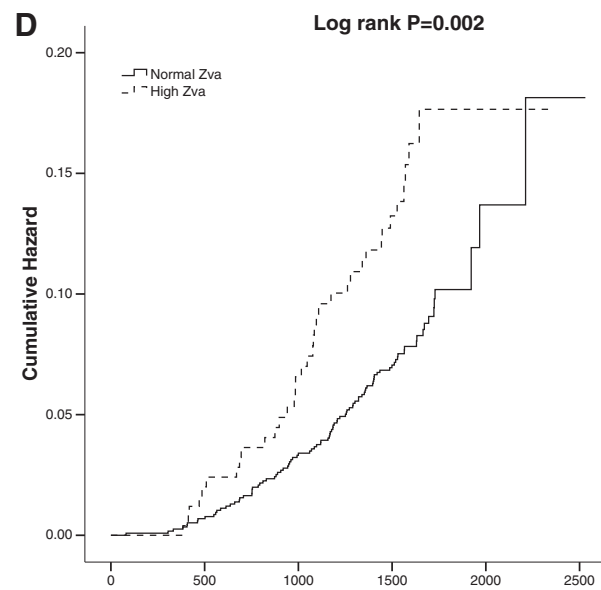

*Patients at risk*

|            |      |      |      |     |    |   |
|------------|------|------|------|-----|----|---|
| High Zva   | 252  | 247  | 235  | 193 | 12 | 0 |
| Zva Normal | 1166 | 1157 | 1126 | 928 | 56 | 1 |
